# Supplementary material for: NF2 loss malignantly transforms human pancreatic acinar cells and enhances cell fitness under environmental stress
Source: JCI journal article supplement (doi:10.1172/jci194395), 2026-01-01
Supplement: sd1 [file 1]

# Supplementary Materials for

## ***NF2* loss malignantly transforms human pancreatic acinar cells and enhances cell fitness under environmental stress**

Yi Xu *et al.*

\*Corresponding author. Email: [Wangp3@uthscsa.edu](mailto:Wangp3@uthscsa.edu), liuj8@uthscsa.edu

This PDF file includes:

- Figure. S1 to S8 and corresponding legends
- Description of Supplementary Tables 1-7

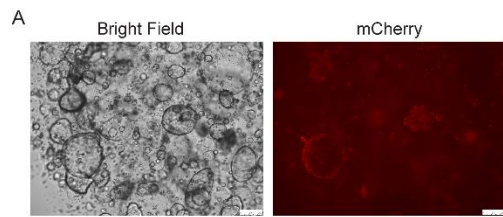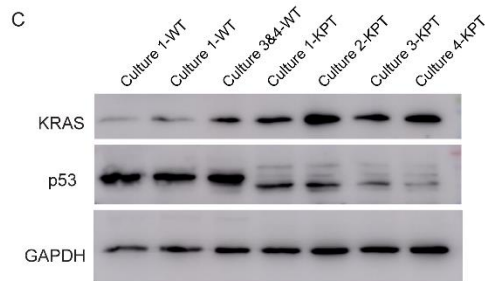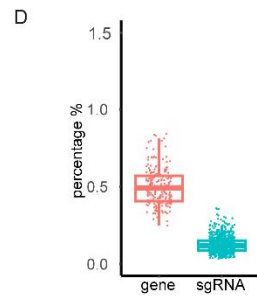

**B**

| Culture 1   |                                                               | Variation | Percentage |
|-------------|---------------------------------------------------------------|-----------|------------|
| <i>P16</i>  | GGCTGACTGGCTGGCCACGGCCGCG   GCCCGGGGTCGGGTAGAGGAGGTGC         | Wild type | 0%         |
|             | GGCTGACTGGCTGGCCACGGCCGCG   -----GGTAGAGGAGGTGC               | -11bp     | 48%        |
|             | GGCTGACTGGCTGGCCACGGCCGCG   nnnnnnGCCCGGGGTCGGGTAGAGGAGGTGC   | +5bp      | 41%        |
|             |                                                               | Others    | 11%        |
| <i>TP53</i> | TCCTTCAGACTTCCTGAAAACAACG   TTCTGGTAAGGACAAGGGTTGGGCT         | Wild type | 0%         |
|             | TCCTTCAGACTTCCTGAAAACAACG   -----TGGTAAGGACAAGGGTTGGGCT       | -4bp      | 44%        |
|             | TCCTTCAGACTTCCTGAAAACAACG   -----GGGTTGGGCT                   | -17bp     | 40%        |
|             | TCCTTCAGACTTCCTGAAAACAACG   -----GTTGGGCT                     | -17bp     | 12%        |
|             |                                                               | Others    | 4%         |
| Culture 2   |                                                               | Variation | Percentage |
| <i>P16</i>  | GGCTGACTGGCTGGCCACGGCCGCG   GCCCGGGGTCGGGTAGAGGAGGTGC         | Wild type | 5%         |
|             | GGCTGACTGGCTGGCCACGGCCGCG   -----CCCGGGGTCGGGTAGAGGAGGTGC     | -1bp      | 39%        |
|             | GGCTGACTGGCTGGCCACGG-----   -----AGGTGC                       | -24bp     | 10%        |
|             | GGCTGACTGGCTGGCCA-----   -----AGGAGGTGC                       | -24bp     | 4%         |
|             | GGCTG-----   -----GGGTAGAGGAGGTGC                             | -24bp     | 31%        |
|             |                                                               | Others    | 11%        |
| <i>TP53</i> | TCCTTCAGACTTCCTGAAAACAACG   TTCTGGTAAGGACAAGGGTTGGGCT         | Wild type | 0%         |
|             | TCCTTCAGACTTCCTGA-----   TTCTGGTAAGGACAAGGGTTGGGCT            | -8bp      | 14%        |
|             | TCCTTCAGACTTCCTG-----   -----GTAAGGACAAGGGTTGGGCT             | -14bp     | 38%        |
|             | TCCTTCAGACTTCCT-----   -----TGGTAAGGACAAGGGTTGGGCT            | -13bp     | 4%         |
|             | TCCTTCAGACTTCCTGAAAACAACG   nnnnnnnnTTCTGGTAAGGACAAGGGTTGGGCT | +8bp      | 9%         |
|             | TCCTTCAGACTTCCTGAAAACAACG   nnnnnnnnTTCTGGTAAGGACAAGGGTTGGGCT | +9bp      | 4%         |
|             |                                                               | Others    | 31%        |
| Culture 3   |                                                               | Variation | Percentage |
| <i>P16</i>  | GGCTGACTGGCTGGCCACGGCCGCG   GCCCGGGGTCGGGTAGAGGAGGTGC         | Wild type | 0%         |
|             | GGCTGACTGGC-----   GCCCGGGGTCGGGTAGAGGAGGTGC                  | -14bp     | 37%        |
|             | GGCTGACTGGCTG-----   -----CCCGGGGTCGGGTAGAGGAGGTGC            | -13bp     | 36%        |
|             | GGCTGACTGGCT-----   -----GCCCGGGGTCGGGTAGAGGAGGTGC            | -13bp     | 3%         |
|             |                                                               | Others    | 24%        |
| <i>TP53</i> | TCCTTCAGACTTCCTGAAAACAACG   TTCTGGTAAGGACAAGGGTTGGGCT         | Wild type | 0%         |
|             | TCCTTCAG-----   -----GGGCT                                    | -37bp     | 16%        |
|             | TCCTTCAGACTTCCTGAAAACAAC-----   TTCTGGTAAGGACAAGGGTTGGGCT     | -1bp      | 13%        |
|             | TCCTTCAGACTTCCTGAAAACAACG   -----TCTGGTAAGGACAAGGGTTGGGCT     | -1bp      | 10%        |
|             | TCCTTCAGACTTCCTGAAAACAAC-----   -----TCTGGTAAGGACAAGGGTTGGGCT | -2bp      | 5%         |
|             | TCCTTCAG-----   -----GGGCT                                    | -38bp     | 5%         |
|             |                                                               | Others    | 51%        |
| Culture 4   |                                                               | Variation | Percentage |
| <i>P16</i>  | GGCTGACTGGCTGGCCACGGCCGCG   GCCCGGGGTCGGGTAGAGGAGGTGC         | Wild type | 0%         |
|             | GGCTGACTGGCTGGCCACGGCCG---   GCCCGGGGTCGGGTAGAGGAGGTGC        | -2bp      | 49%        |
|             | GGCTGACTGGC-----   GCCCGGGGTCGGGTAGAGGAGGTGC                  | -14bp     | 36%        |
|             | GGCTGACTGGCTG-----   -----CCCGGGGTCGGGTAGAGGAGGTGC            | -14bp     | 4%         |
|             |                                                               | Others    | 11%        |
| <i>TP53</i> | TCCTTCAGACTTCCTGAAAACAACG   TTCTGGTAAGGACAAGGGTTGGGCT         | Wild type | 0%         |
|             | TCCTT-----   -----GGTGGGCT                                    | -36bp     | 86%        |
|             |                                                               | Others    | 14%        |

**Figure S1. Establishing engineered acinar organoid culture and validating CRISPR sgRNA library.** **A.** Representative bright field and fluorescence images of acinar organoids transduced with lentivirus expressing mCherry tagged *KRAS*<sup>G12V</sup> construct from 4 biological replicates. Scale bar = 250  $\mu$ m. **B.** Sanger sequencing analysis of *CDKN2A/p16* and *TP53* at the sgRNA target site in 4 independent cultures. **C.** Western blot of KRAS and p53 expression in wild type and KPT mutant organoids. **D.** Unbiased distribution of all 796 sgRNAs and corresponding target genes in the library plasmid DNA. The middle line of box represents the median value, the bounds of box represent the Interquartile Range, and the whiskers extend to  $1.5 \times$  Interquartile Range.

A

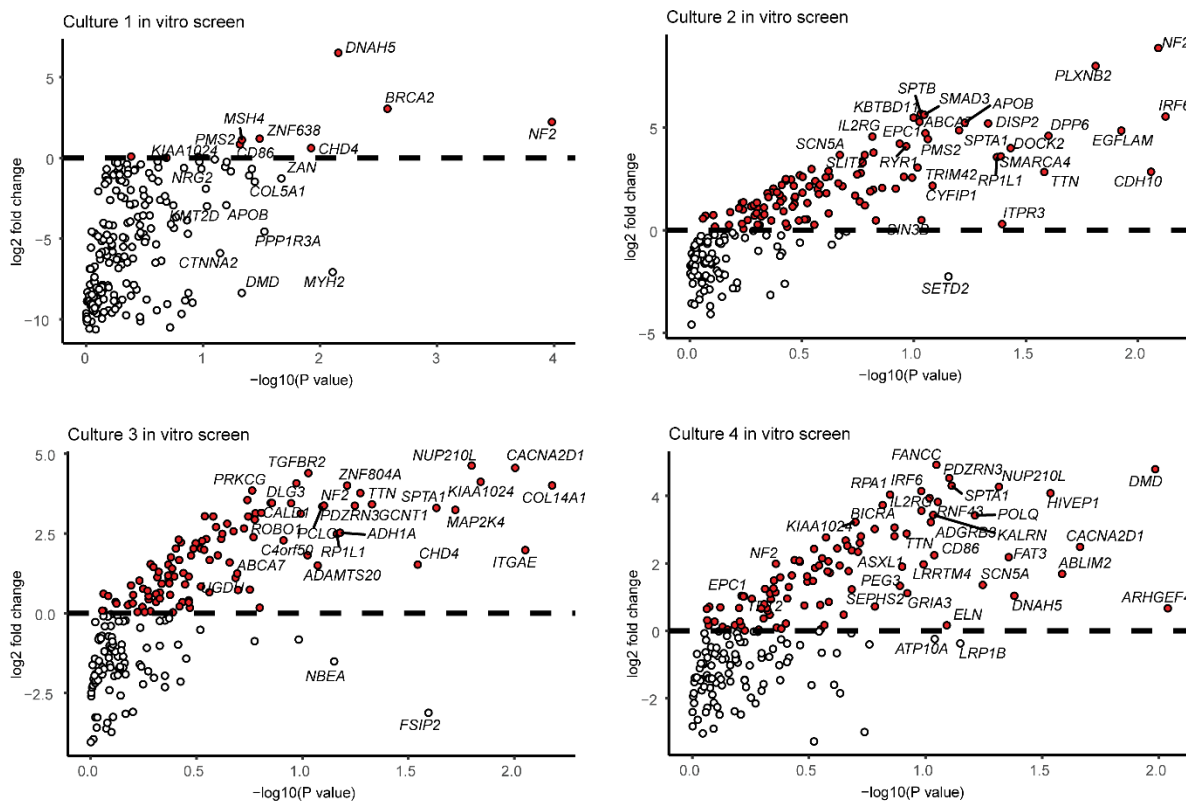

B

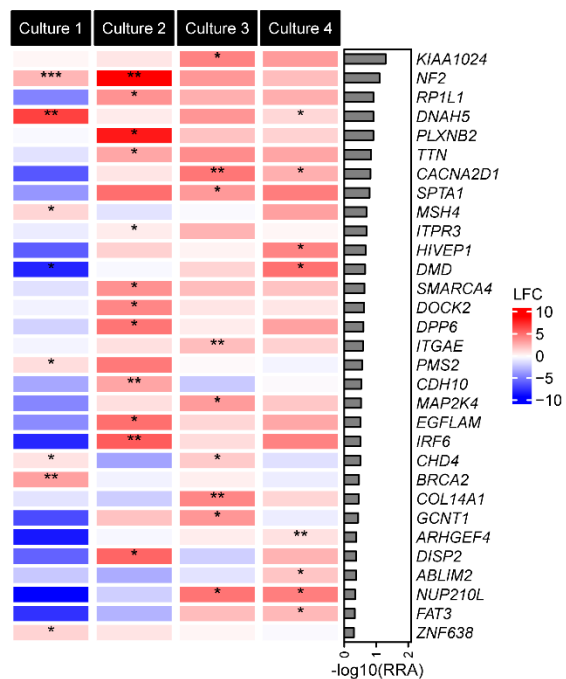

C

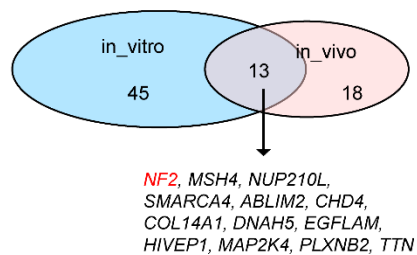

**Figure S2. *In vitro* CRISPR screen results.** **A.** Scatter plot of the enrichment of target genes from *in vitro* CRISPR screen from 4 independent cultures. The Y axis represents log2 fold change of the sgRNA distribution of an indicated target gene compared with the control. X axis represents  $-\log_{10}$  P value. Positively enriched targets ( $\log_2$  fold change  $> 0$ ) in individual replicate were highlighted in red. **B.** Heatmap of all target genes whose sgRNAs were found to be positively enriched ( $\log_2$  fold change  $> 0$ , P value  $< 0.05$ ) in any of the 4 independent cultures. The color scale represents log2 fold change (LFC) of sgRNA distribution compared with the control. The side bar plot indicates the averaged  $-\log_{10}$  (RRA) value of each target gene across all replicates. \*, \*\*, \*\*\* indicate p-value  $< 0.05$ , 0.01, 0.001, respectively. **C.** Comparison of the enriched target genes between *in vivo* and *in vitro* screen.

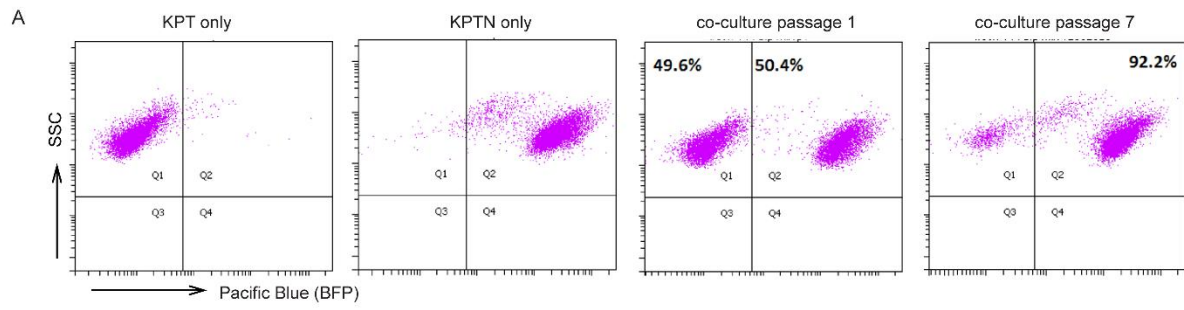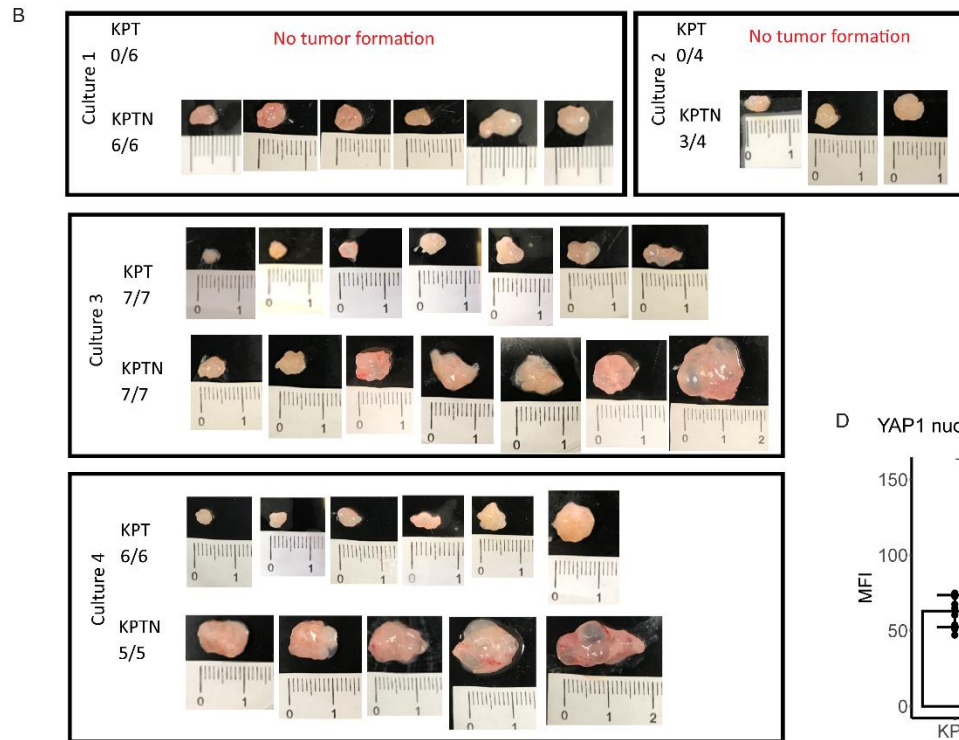

**D** YAP1 nuclear staining

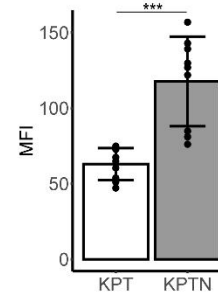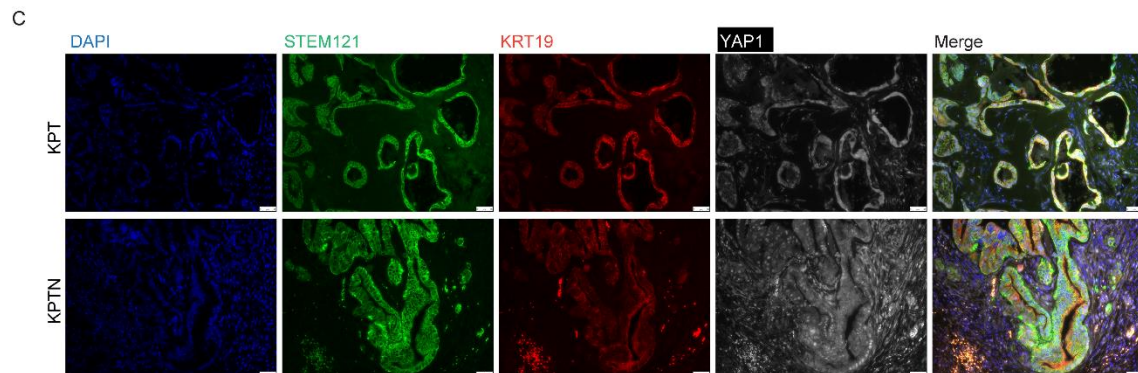

**Figure S3. Loss of *NF2* results in growth advantage of engineered acinar cells *in vitro* and *in vivo*.** **A.** Flow cytometry analysis of BFP signal in KPT culture, KPTN culture or their coculture at 1:1 ratio. **B.** Photos of all xenograft tumors harvested from NSG mice transplanted with KPT or KPTN organoids. **C.** Low magnification images of the immunofluorescence staining as shown in **Figure 2E**. Cell nuclei was counter stained with DAPI. Scale bar = 50  $\mu\text{m}$ . **D.** Quantification of YAP1 nuclei staining from 3 sections with 3 random fields of view for each. Data was analyzed by two-tailed Student's t test. Error bar represents standard deviation. \*\*\* indicates p-value < 0.001.

A

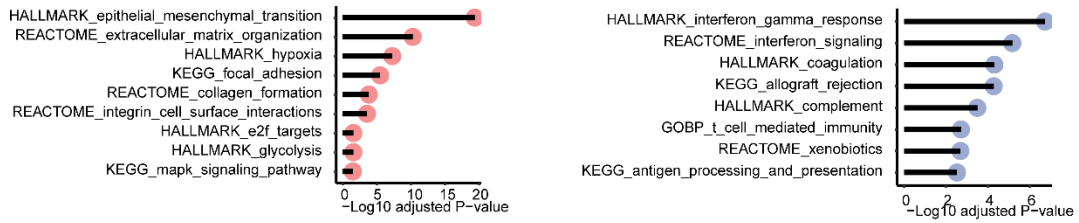

B

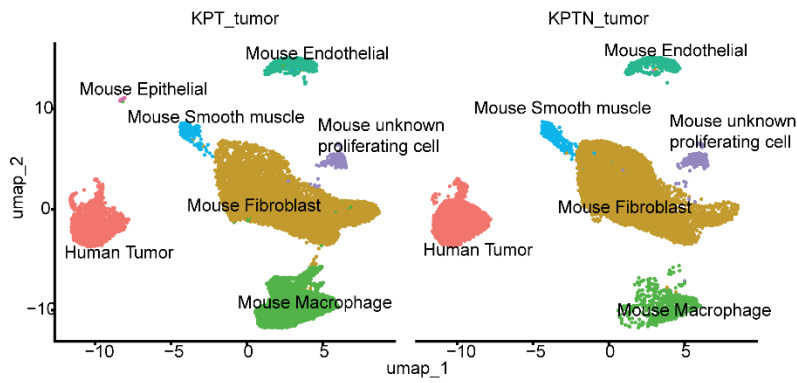

C

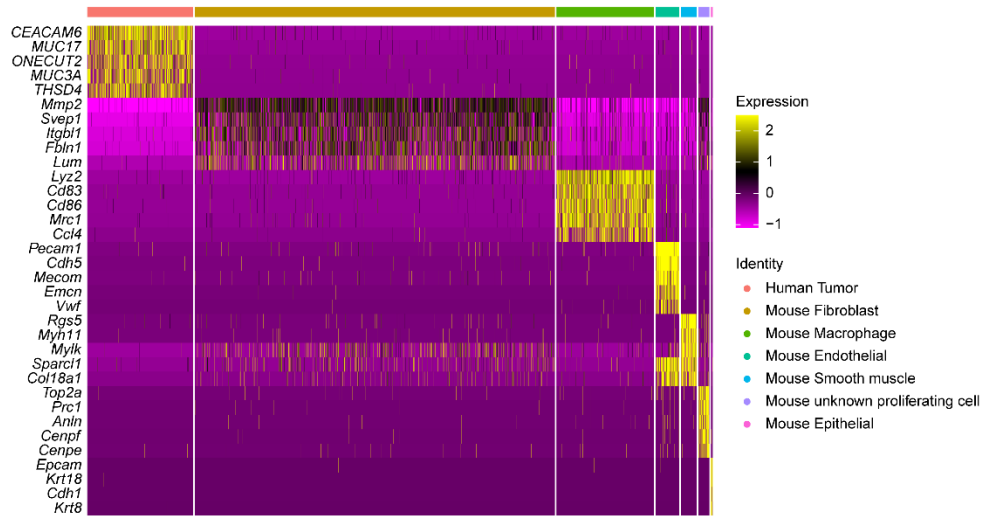



**Figure S4. Transcriptomic analysis of KPT versus KPTN tumors.** **A.** Overrepresentation analysis for upregulated (in red) and downregulated genes (in blue) in KPTN tumor as shown in **Figure 3A**. A significant enrichment at pathway level was considered with multiple-test adjusted p-value < 0.05. **B.** Annotation of all cell populations present in KPT and KPTN-derived tumor tissues in single cell RNA seq analysis. **C.** Expression heatmap of top feature genes in each cell populations as shown in **B**.



**Figure S5. Comparison of engineered acinar organoid-derived tumors with TCGA PDAC samples.** **A.** Expression heatmap of classic and basal PDAC subtype gene signatures in TCGA PDAC samples as well as KPT and KPTN tumor samples generated in the present study. **B.** Expression of *NF2* induced malignancy-associated genes curated from single cell RNA seq data in TCGA PDAC samples. TCGA PDAC samples were grouped by subtype or grade. The middle line of box represents the median value, the bounds of box represent the Interquartile Range, and the whiskers extend to  $1.5 \times$  Interquartile Range. Statistical analysis was performed by two-tailed Student's t test. \*, \*\*\* indicate p-value  $< 0.05$  and  $0.001$ , respectively, between 2 groups. **C.** Expression of indicated gene modules in all the populations as shown in **Figure 4A**.

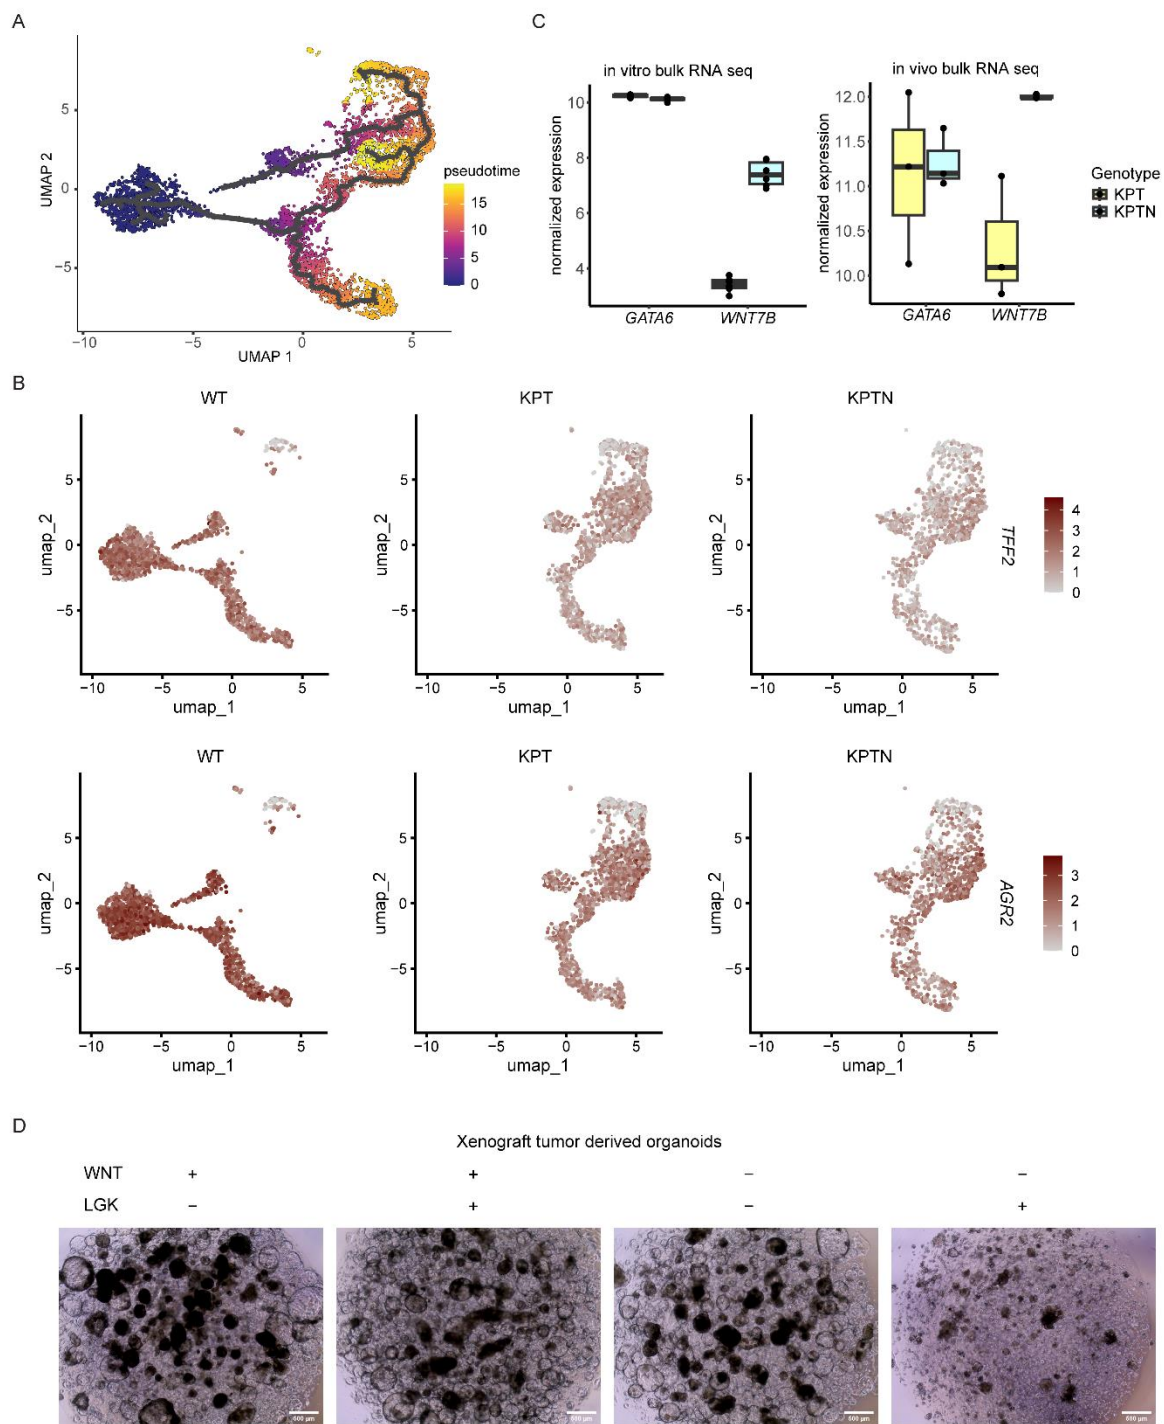

**Figure S6. Transcriptomic analysis of engineered acinar organoid cultures.** **A.** Pseudo time trajectory analysis of all cell populations shown in **Figure 5C**. **B.** Expression level of indicated genes in all the cells populations shown in **Figure 5C**. **C.** Log2 transformed normalized gene expression of *WNT7B* and *GATA6* in bulk RNA seq analysis of KPT and KPTN *in vitro* cultures (left, n = 6 each) and xenograft tumors (right, n = 3 each). The middle line of box represents the median value, the bounds of box represent the Interquartile Range, and the whiskers extend to  $1.5 \times$  Interquartile Range. **D.** Representative images of tumor-derived organoids incubated with or without WNT3A supplement or LGK974 treatment (100 nM) from 4 biological replicates. Scale bar = 500  $\mu$ m.

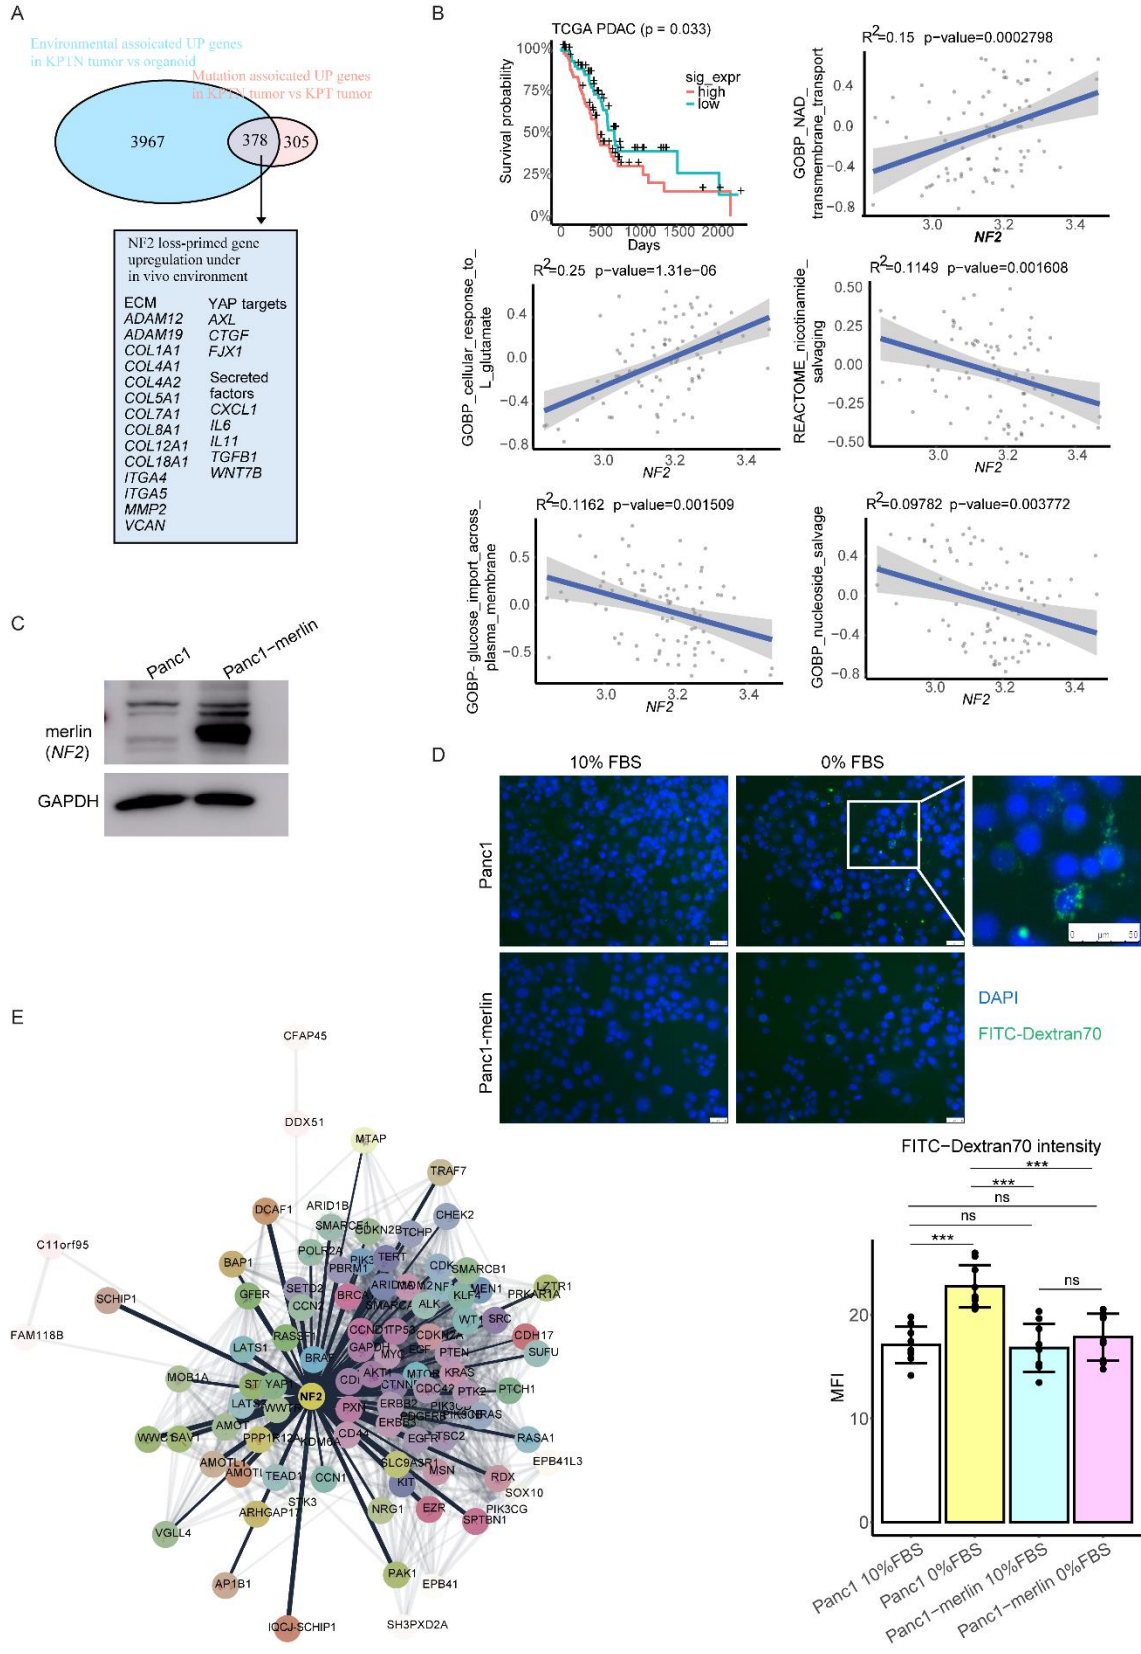

**Figure S7. *NF2* inactivation promotes cell survival under nutrient deprivation via enhanced macropinocytosis.** **A.** Comparison of environmentally and genetically induced upregulated genes in KPTN tumors. Environmentally induced upregulated genes were curated from the comparison of KPTN tumors vs organoids (shown in **Figure 7A**). *NF2* loss induced upregulated genes was curated from the comparison of KPTN tumors vs KPT tumors (shown in **Figure 3A**). **B.** Top left: KM plot of TCGA PDAC patient survival separated by median expression score of starvation associated genes as described in **Figure 7A-B**. Top right, middle and bottom: Correlation of indicated pathways with *NF2* expression level in TCGA PDAC samples. **C.** Western blot of merlin protein expression in Panc1 cells transfected with pcDNA3-merlin plasmid or an empty vector. **D.** Representative images and quantification of FITC-Dextran70 signal in Panc1 cells cultured in 10% FBS or 0% FBS with or without merlin overexpression. Quantification was performed from 3 sections with 3 random fields of view for each. Data was analyzed by two-tailed Student's t test. Error bar represents standard deviation. ns and \*\*\* indicate no significance and p-value < 0.001, respectively. **E.** Protein-protein interaction network of *NF2* in STRING database.



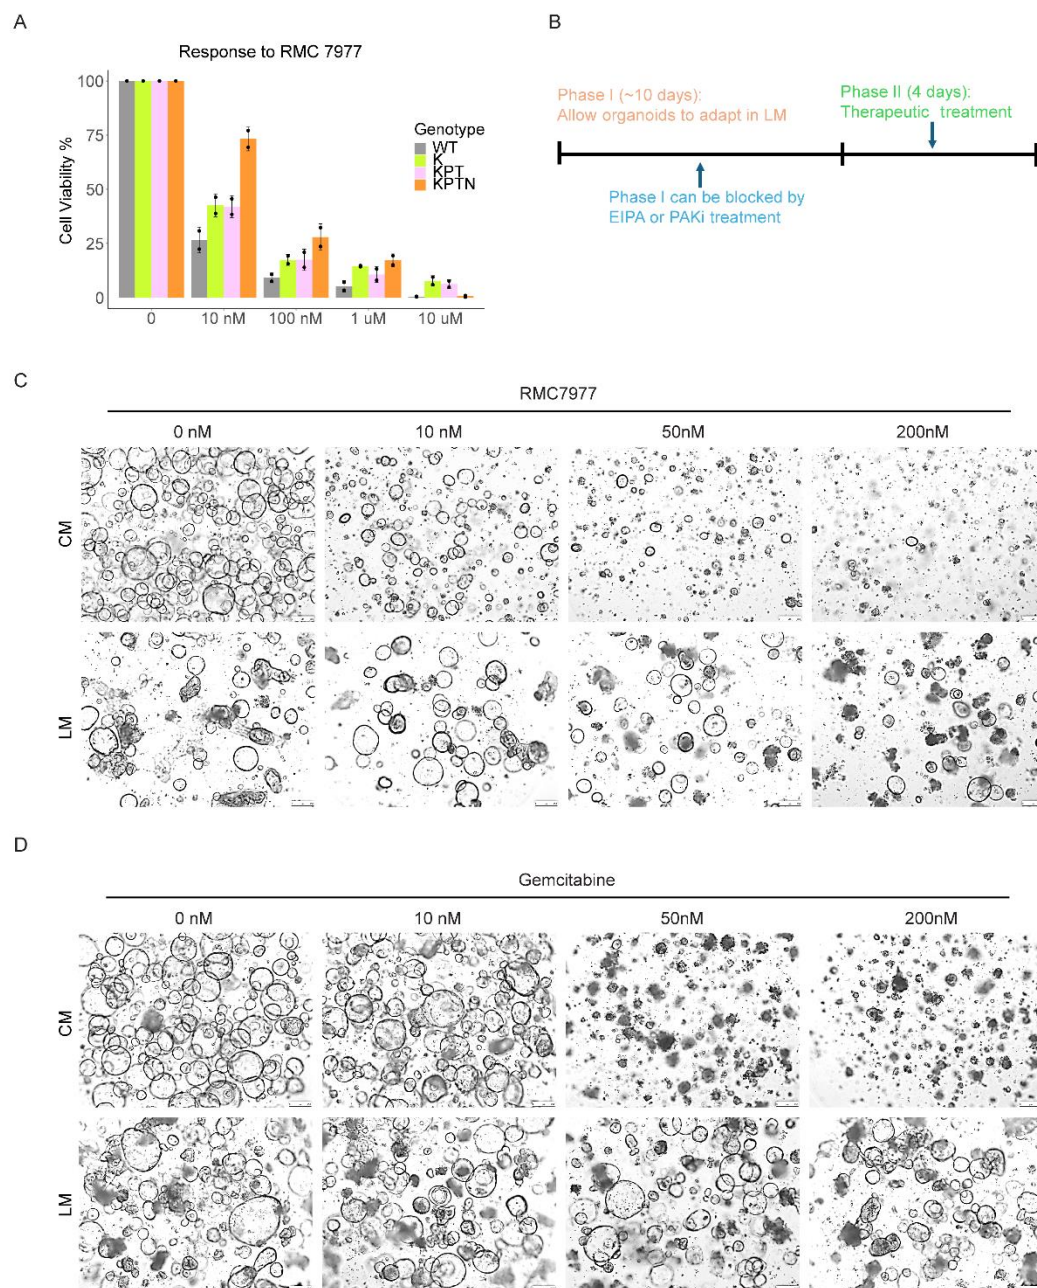



**Figure S8. *NF2* loss and nutrient starvation cooperate to induce therapeutic resistance.** **A.** Response to RMC 7977 from acinar 3D cultures harboring different genetic backgrounds (n = 2 for each genotype). K: *KRAS* mutation, KPT: *KRAS*, *CDKN2A/p16*, *TP53* triple mutation, KPTN: *KRAS*, *CDKN2A/p16*, *TP53*, *NF2* quadruple mutation. **B.** Schematic illustration of experimental workflow for **Figure 9A-F**. **C.** Representative images of KPTN organoids cultured in CM or LM and treated with RMC 7977 at indicated doses or vehicle control from 4 independent experiments. Scale bar = 250  $\mu$ m. **D.** Representative images of KPTN organoids cultured in CM or LM and treated with Gemcitabine at indicated doses or vehicle control from 4 independent experiments. Scale bar = 250  $\mu$ m.

### Supplementary Table List

**Supplementary Table 1.** Organ donor information of the pancreatic tissues used in this study.

**Supplementary Table 2.** sgRNA sequences of the CRISPR knockout library.

**Supplementary Table 3.** Enrichment analysis summary at gene level for the *in vivo* and *in vitro* CRISPR screen.

**Supplementary Table 4.** Enriched target genes from CRISPR screen described in **Figure 1D** and the core signaling pathways in human pancreatic cancer in which the indicated target genes are involved.

**Supplementary Table 5.** List of DEGs from bulk RNA seq analysis described in **Figure 3A, 5A** and **7A**.

**Supplementary Table 6.** Top 20 marker genes for each cell population from scRNA seq analysis described in **Figure 3B, 4A** and **5C**.

**Supplementary Table 7.** Other curated gene signatures from the present or previous studies.
