# Supplementary material for: NF2 loss malignantly transforms human pancreatic acinar cells and enhances cell fitness under environmental stress
Source: JCI journal article supplement (doi:10.1172/jci194395), 2026-01-01

Full unedited gel for **Figure 2B**

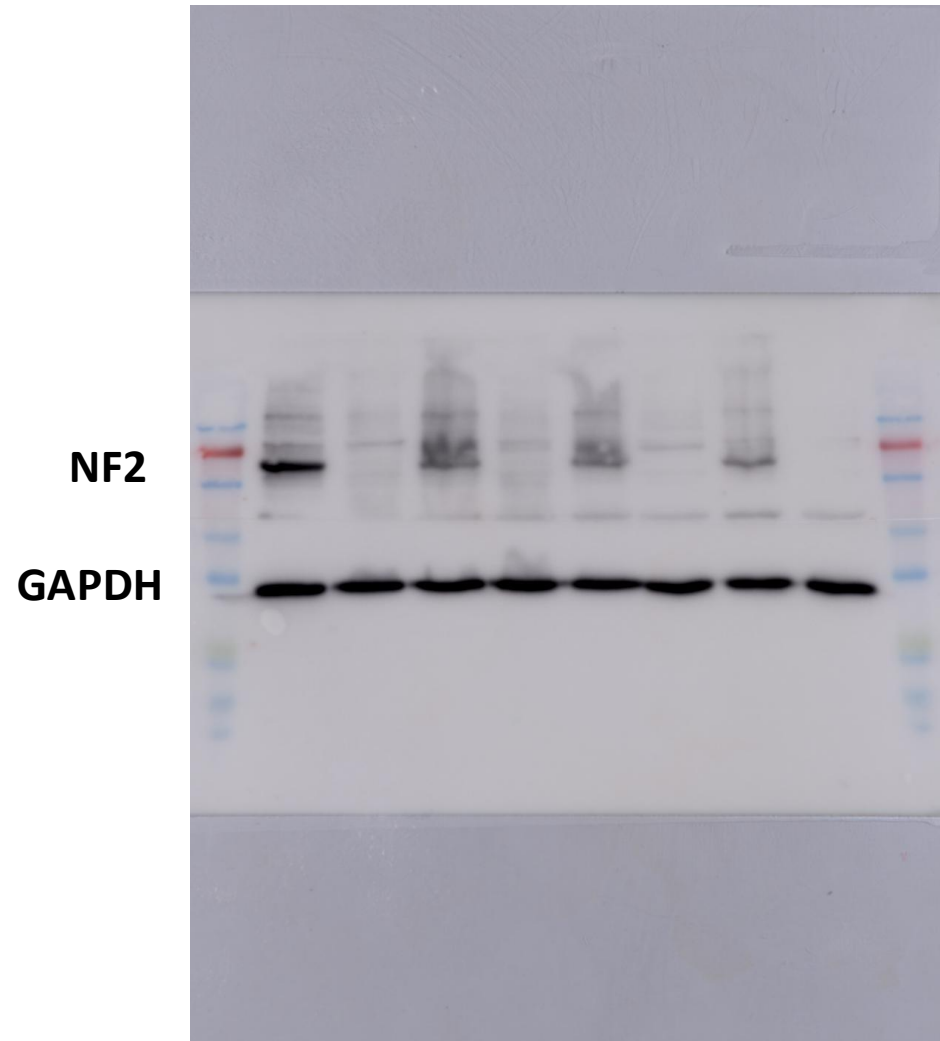

Full unedited gel for **Figure S1C**

**p53**

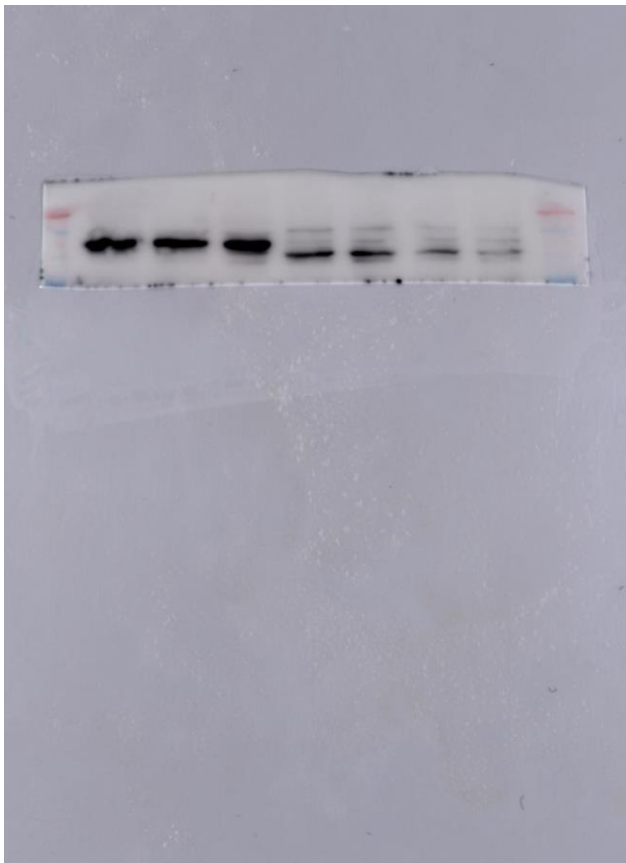

**KRAS**

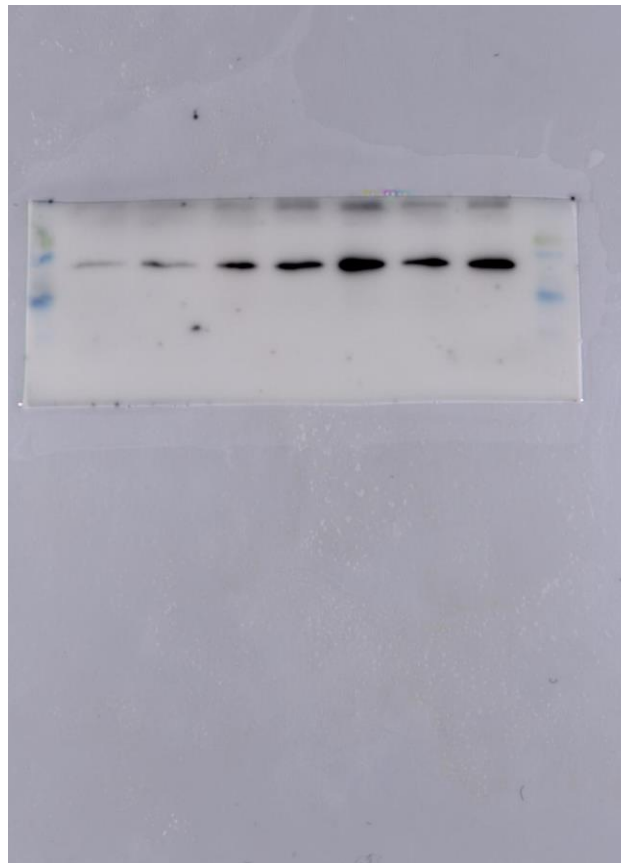

**GAPDH**

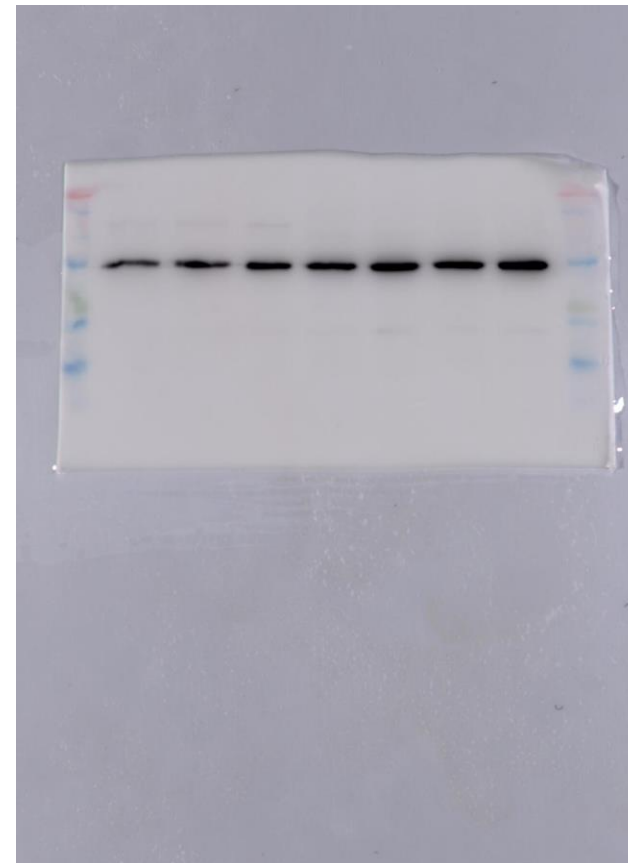

Supplement: sd2 [file 2]
